# Supplementary material for: Using Continuous Quality Improvement to Design and Implement a Telepsychiatry Program in Rural Illinois
Source: Atypon-hosted journal article supplement (doi:10.1176/appi.ps.201900231), 2020-04-15
Supplement: appi.ps.201900231.ds001.pdf [file appi.ps.201900231.ds001.pdf]

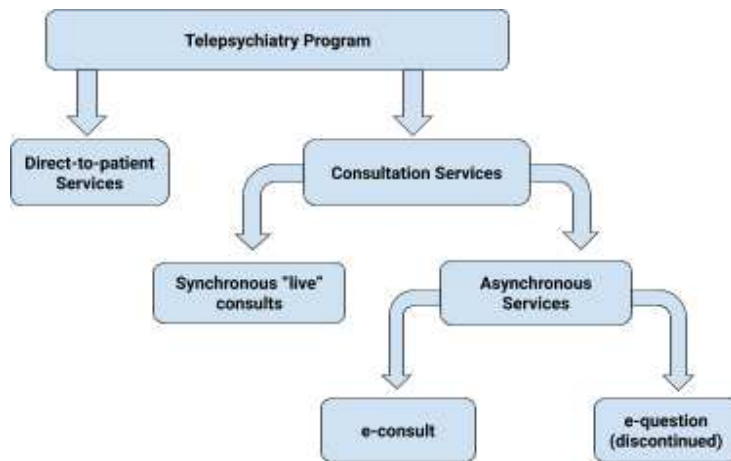

### **Telepsychiatry Program Structure**

*A structural model of the telepsychiatry program implemented by OSF Healthcare in partnership with Regroup from April 2016 through January 2018.*
